1 **Assessment of dependency and consumption pattern of different forest products by the**  
2 **forest fringe villages of Shivalik Himalaya, Uttarakhand, India**

3 **Jiju, JS\*<sup>1,2</sup>, Soumya Dasgupta<sup>1</sup>, Amit Kumar<sup>1</sup>, Mohit Gera<sup>2</sup>**

4 \* Corresponding author – Jiju J. S.

5 1- Wildlife institute of India, Chandrabani, Dehradun, India- 248001

6 2- Indira Gandhi National Forest Academy, Dehradun, India - 248006

7 Jiju J. S. Researcher, Wildlife Institute of India, Chandrabani, Dehradun, India-248001 and  
8 Indira Gandhi National Forest Academy, Dehradun, India. Email - [jiju.ujij88@gmail.com](mailto:jiju.ujij88@gmail.com). Phone  
9 - +91-9458124382

10 Dr. Soumya Dasgupta, Project Associate, Wildlife Institute of India, Chandrabani, Dehradun,  
11 India – 248001. Email – [dgsoumya84@gmail.com](mailto:dgsoumya84@gmail.com)

12 Dr. Amit Kumar. Scientist C, Wildlife Institute of India, Chandrabani, Dehradun, India -248001.  
13 Email - [amit@wii.gov.in](mailto:amit@wii.gov.in).

14 Dr. Mohit Gera, Professor academics and Member Secretary REDD – Plus Cell, Indira Gandhi  
15 National Forest Academy, Dehradun, India. Email - [mohitgera87@gmail.com](mailto:mohitgera87@gmail.com)

16

17

18

19

20

21

22

23

24

25

26

27

28

29

30 **Assessment of dependency and consumption pattern of different forest products by the**  
31 **forest fringe villages of Shivalik Himalaya, Uttarakhand, India**

32 **Abstract:**

33 Forest are essential for human beings for the enormous services it gives for livelihood and  
34 subsistence in the developing countries. We estimated the consumption and extraction levels of  
35 three major forest products viz., timber, fuelwood, and fodder in 20 forest fringe villages of the  
36 Timli forest range of Uttarakhand, India. We used a questionnaire-based household-level survey  
37 to collect information on the household economy and dependence of 380 households selected  
38 through stratified random sampling. We estimated that 69% of the overall yearly timber  
39 consumption of 20 villages, which comes around 2750 cubic meters (cum), was extracted from  
40 the nearby forest. The average timber consumption was  $0.52 \pm 0.22$  cum household<sup>-1</sup> year<sup>-1</sup>. We  
41 estimated the total annual fuelwood and fodder consumption to be 298913.89, and 204475  
42 Quintal (Qt). The average fuelwood and fodder consumption were estimated to be 417.6 Quintal  
43 household<sup>-1</sup> year<sup>-1</sup> and  $49 \pm 9.1$  Qt. household<sup>-1</sup> year<sup>-1</sup>. We did general linear regression analysis  
44 to assess major biophysical and socio-economic determinants of villages and households for  
45 dependency on timber, fuelwood, and fodder. We found that the population of the village,  
46 distance from forest, distance from market, and annual average income are the major  
47 determining factors for timber, fodder, and fuelwood demand of the villages. Extraction of  
48 timber and non-timber forest products was the primary cause of depletion of forest biomass and  
49 forest carbon emission. Conservation effective management strategies in collaboration with all  
50 the stakeholder departments are needed to conserve forest resources with minimum extraction  
51 pressure from forest fringe villages of the study area.

52 **Keywords:** Himalayan foothills, forest dependency, NTFP, biomass utilization,

53

54

55

56

57

58

59

## 60 Highlights

- 61 • Questionnaire based household level survey was done to assess extraction and consumption  
62 patten of fuelwood, fodder and timber in Shivalik range of Uttarakhand, India.
- 63 • Fuelwood and Timber consumption was found high compared to other studies in the low  
64 altitude areas.
- 65 • 69% of total timber and 62% of the total fodder requirement met from the adjacent forest  
66 areas.
- 67 • Population of the village, distance from the forest and nearby market place, and annual  
68 average income were the major determinants of dependency of different forest products.

69

70

71

72

73

74

75

76

77

78

79

80

81

82

83

84

85

86

## 87 **1. Introduction**

88 Forest is an important natural resource for rural livelihood providing various services (Hussain et  
89 al 2019, Wunder et al 2014). Fuelwood is one of the oldest sources of energy known to man and  
90 used for over 500,000 years (Sharpe 1976), and by 2.7 billion people along with other traditional  
91 biomass, such as dung and agricultural by-products (IEA, 2010, 2017, Rahut et al 2016). In  
92 developing and underdeveloped countries, fuelwood is still the most important source of energy  
93 (Banyal et al 2013). Along with it, fodder and timber are the other forest products most  
94 commonly used by the rural people in developing nations (Singh and Sundriyal 2009, Nagothu  
95 2001). More than one-third of the total energy demand, especially in the domestic sector of the  
96 developing countries' rural population met through extracted biomass (Natarajan 1985;  
97 Vasudevan and Santosh 1987; FAO 2007). In developing countries, 70% of rural households use  
98 fuelwood as primary energy sources for cooking and space heating (Mishra 2008). Dependency  
99 on forest and other associated resources as the primary energy source were very high, especially  
100 in the rural areas of the developing countries (Hussain et al 2019). As for example, the  
101 dependency on forest biomass as primary source of energy was up to 87% in India (Madhu 2009,  
102 and Bhatt et al 2016), 77% in Nepal (Benato et al 2016), 78% in Bhutan (Rana et al 2016), 73%  
103 in Bangladesh (Huda et al 2014), 38.82% in Myanmar (Wen et al., 2017), 30% in Malawi  
104 (Fisher, 2004); up to 39% in western Ethiopia (Mamo et al., 2007); 40% in Zimbabwe  
105 (Cavendish, 2000) and up to 80% in Sub Saharan Africa (Sassen et al 2015). Fuelwood  
106 extraction often leads to forest degradation when the extraction is high, forest resources are  
107 limited, and alternative energy resources such as kerosene or Liquid Petroleum Gas (LPG) are  
108 unavailable (Kohl et al 2015, Specht et al 2015, WEC 2016, Nagothu 2001).

109 Agriculture and livestock rearing are significant livelihood sources in the villages situated near  
110 the forest areas (Kumar et al 2019). In turn, rearing livestock depends extensively on the forest,  
111 as forests are the major source of grass and fodder for livestock like bovine and ruminants reared  
112 by the villagers (Velho et al 2018, Nayak et al 2012). Open and uncontrolled grazing practices in  
113 Indian forests have an adverse impact on growing stock and regeneration (Agarwala et al 2016).  
114 Forest in India can support about 30 million livestock grazing, whereas 270 million cattle graze  
115 in (ICFRE 2001). According to Roy and Singh (2008), the estimated annual requirement and  
116 availability of dry fodder was to be 569 Metric Ton (MT) and 385 MT, and that of green fodder

117 was to be 1025 MT and 356 MT, respectively. The difference in the requirement and availability  
118 clearly explains the high pressure on India's forest due to the livestock population and how the  
119 demand for more fodder contributes to forest degradation in the country's human-dominated  
120 landscapes.

121 In India, around 275 million people, coming around 40% of the country's total poor population  
122 live in the forest fringes and depend on the forest for their livelihood (Velho et al 2018, Nayak et  
123 al 2012, World Bank 2006). On the other hand, more than 40% of the forests in the country are  
124 understocked and degraded (Aggarwal et al 2009; Bahuguna et al 2004). Gera et al (2017)  
125 revealed a loss of approximately 16% carbon from 1998 to 2014 due to forest degradation.  
126 Various factors starting from geographic to demographic and socio-economic are responsible for  
127 the degradation (Imai et al 2018, Rustagi et al 2010, Agarwal 2007). An increase in the  
128 agriculture depended population having low income, large and unproductive bovine population,  
129 restricted means of livelihood resulting in a vicious cycle of poverty exerting tremendous  
130 pressure on forests and make the ecosystem fragile to come back to its previous state (Davidar et  
131 al 2010). The adverse impacts of climate change will be additional pressure on the already  
132 vulnerable vegetation (Shrestha et al 2018, Chaturvedi et al 2011), and can significantly affect  
133 the flow of services from forests in terms of both quality and quantity (Nelson et al 2013;  
134 Scholes 2016). The impact will be on the forest dependent communities deriving their livelihood  
135 needs from the collection, handling, value addition, and selling of Non-Timber Forest Products,  
136 as the availability of many of the NTFPs is likely to be decreased more in the effect of climate  
137 change compared to timber and fuelwood (Robeldo and Forner 2005).

138 The socio-economic profile of an area determines the resource use pattern and enables the  
139 management authorities to prioritize the needs of the people inhabiting the area (Sharma et al  
140 2009, Jain 2010, Barnes et al. 2011; Lee et al. 2013; Bansal et al. 2013). Additionally, in the  
141 current scenario, forest resources are insufficient, and forest degradation is happening at a faster  
142 rate (Gera et al. 2017). Effective human welfare and biodiversity conservation requires an  
143 understanding of household and village level factors determining the current patterns of forest  
144 resource dependencies and the potential changes in the future (Velho et al 2018, Ofoengbu et al  
145 2017). It is crucial to evaluate the relationship between wealth and other socio-economic factors  
146 like livelihood patterns and socio-political assets modulating forest resources dependencies

147 (Mascia et al 2014, Belchar et al 2015). In the present study, we estimated the extraction and  
148 consumption pattern of fuelwood, timber and fodder by the forest fringe villages of Timli reserve  
149 forest of Uttarakhand. We assessed the preferred species used as fuelwood and timber by the  
150 villagers. We also evaluated the demographic and socio-economic determinants of different  
151 forest resource extraction to understand the future conservation and developmental policy  
152 formulation for protection of diversity and integrity of the forest structure as well as decrease the  
153 resource dependency of the villagers of the study area.

## 154 **2. Study area**

155 The Shivalik landscape (29°57' to 31°20'N and 77°35' to 79°20'E) is the youngest of all the  
156 mountains in India and is significant biogeographically, as it has representative taxa from both  
157 Indo-Malayan to Palaeartic regions (Rawat and Mukherjee 2005). The fragile land formations,  
158 subtropical to a tropical climate, varied topography, and alluvial soil characterizes the region  
159 with undulating terrain intersected by seasonal streams (locally known as *Rau*) that drain this  
160 region (Johnsingh et al 2004; Rawat and Mukherjee 2005). We conducted the study in the forest  
161 fringe villages of the Timli Range of Shivalik region of Uttarakhand state, India (Figure 1). The  
162 study area is situated in the eastern part of Doon valley (30°19' to 30°32'N and 77°34' to  
163 78°0'E) with an area of 99.07 km<sup>2</sup>, and falls under the Kalsi Soil Conservation Forest Division  
164 of Shivalik Circle of Uttarakhand. The entire study area comprises 21 villages and 34  
165 households (Gujjar Deras) of *Gujjar's*, having a total population of 52,162 people (Census India  
166 data 2011). The Yamuna River bounds most of the forest area in the northwest and Shivalik  
167 ridge in the south. The vegetation of this region mainly consists of tropical moist deciduous  
168 forests dominated by *Shorea robusta* and its major associates such as *Mallotus philippensis*,  
169 *Lagerstroemia parviflora*, *Ehretia laevis*, *Terminalia tomentosa* and plantations of *Tectona*  
170 *grandis*, *Eucalyptus* and Bamboo species. As per Champion and Seth (1968), Moist Shivalik Sal  
171 forests (3C/C2a), Dry Shivalik Sal Forests (5B/C1a), Northern Dry Mixed Deciduous Forests  
172 (5B/C2), and Low Alluvial Savannah Woodland (3/1S1) are the major forest types in the study  
173 area. The temperature of this region ranges from 40°C in summers to very cold (2°C) in winters  
174 (Yadav and Nandy 2015) and the average annual rainfall is 1550mm. Gujjar community, also  
175 known as Van Gujjars locally, are migratory pastoralists of the Himalayas and have distinct  
176 culture and traditions (Hussain et al 2017). Rearing buffaloes, goats and sheep are the primary

177 source of income for Gujjars. Other major inhabitants of the study area include Garhwali and  
178 Nepali.

### 179 **3. Methodology**

180  
181 We carried out the study along with the working plan exercise of Indian Forest Service officers  
182 training courses of 2013-15 and 2014-16 during November 2014 and November 2015. Basic  
183 information collected from the Census India data set based on 2011 countrywide census data  
184 available in census.india website and verified through the village-level survey with the village  
185 head and elderly people of the villages. We have used s standardized questionnaire to conduct  
186 the socio-economic survey at the level of villages and households. The introduction on the  
187 village's socio-economic profile i.e., population, occupation, landholding & land use, access to  
188 drinking & irrigation water, and other facilities such as school, hospital, government institutions,  
189 and market were recorded through focused group discussion at the village level. We recorded the  
190 information on the collection, use, and selling of NTFPs and the human-animal conflict during  
191 the village level discussion. After collecting socio-economic information at the village level, we  
192 collected information on household's economy and dependence of households on forest  
193 products, viz., timber, fuelwood, fodder, grazing, and NTFP, etc through a household level  
194 survey. The population of the villages varied from 168 (*Gujjar Deras*) to 5200 (*Tipparpur*)  
195 individuals. We selected 15 to 25 households from each village for household-level surveys  
196 through stratified random sampling depending on the demography, economy, and societal status  
197 within each village. The information on household resource consumption and forest resource  
198 collection pattern was collected through interviews with a willing member of the household  
199 using a semi-structured questionnaire. We collected information on demography, occupation,  
200 fuelwood, timber and fodder dependency, and extraction pattern, livestock information, distance  
201 from the forest, and other resources like water for drinking and irrigation water source from each  
202 willing household member from 380 households. We estimated the mean values for the villages,  
203 from the information collected on fuelwood, timber and fodder collection and consumption. We  
204 also assessed the difference in fuelwood, timber, fodder consumption and the amount of  
205 extraction from the forest. The details of the household information and average consumption  
206 pattern of different forest resources given in Table 1.

207 We assessed the major fuelwood species used by the villagers and estimated the Use index value  
208 for all the species following Lance et al (1994) and Mitra et al (2017) using equation 1.

$$209 \quad I\% = \frac{n}{N} \times 100 \quad \text{equation 1}$$

210 Use index (I%) presents the percentage of use, 'n' represents the number of villages citing the  
211 use of the tree species, and 'N' represents the total number of villages surveyed (Mitra et al  
212 2017). The high value of the use index for a species denotes the high use of that particular  
213 species and vice versa.

214 We estimated the Pearson's correlation coefficient of different factors affecting the annual  
215 timber, fuelwood, and fodder demand. We used generalized linear regression (GLM) analysis to  
216 identify the major determinants affecting the timber, fodder, and fuelwood extraction (response  
217 variables) by the household using R programming software (R version 3.4.4, 2018-03-15).  
218 Earlier studies revealed that education, income, household size, and access to clean energy like  
219 LPG availability determines the household's choice of using forest biomass as energy source  
220 (Jain 2010, Lee et al 2013, Bansal et al 2013). Along with these factors, we used the village's  
221 total population, distance from the forest, distance from the market, literacy, and net grazing  
222 requirement of the village as factors for the GLM analysis. We used the value of the corrected  
223 Akaike Information Criteria (AICc) to select the best model representing the major determinants  
224 of three response variables.

#### 225 **4. Results:**

226 We surveyed 20 forest fringe villages near the Timli forest division and the number of  
227 households varied from 34 in Gujjar Deras to 855 in Tipparpur village, and the mean household  
228 size estimated  $7.1 \pm 0.17$  persons. The overall literacy rate was 65.4%, which was lower compared  
229 to Dehradun city (84.2%), the state's capital. *Dharmawala* (30%) and *Dhaura* (40%) had the  
230 least literacy rate. The primary source of livelihood includes wage labor and agriculture.  
231 However, individual families were also dependent on various occupations such as small-scale  
232 business, government, and private services for their livelihood. Wage labor is the primary source  
233 of livelihood for most of the respondents, followed by agriculture (18%), albeit small scale,  
234 business (7%), government or private services (4%), and others (4%); (Supplementary Figure 1).  
235 Within the *Gujjars*, the primary income source was pastoralism (90%), followed by wage labor  
236 (10%). The land holdings varied from landless to < 2 ha, however, most households (45%) have



237 land holdings up to 0.5 ha, and 36.5% of the households, including *Gujjars*, are landless. The  
238 most common land use practice was agriculture (irrigated), wherein 64.5% of the land used to  
239 cultivate crops such as wheat, maize, millets, sugarcane, and rice. The other common land uses  
240 in the rest of the land was practiced for un-irrigated agriculture and horticulture. All the villages  
241 had education facilities within the vicinities of 1 km, except *Dhaura* (6 km), *Dandipur* (2 km),  
242 and *Tipparpur* (2 km) (Fig 1). Rearing livestock constitutes an essential source of livelihood.  
243 Most of the respondent families (90.4%) owned livestock; hence they were partially dependent  
244 on the adjoining forests for grazing and fodder collection. The total Adult Cattle Unit (ACU)  
245 holding in all villages was about 14240, with an average ACU of  $2.03 \pm 0.26$  per household. For  
246 grazing pressure on the forests, *Mednipur* village had the highest (2718) ACU and lowest (80.5)  
247 in *Aduwala* (supplementary Fig 2). The primary drinking water sources were tap water (46%)  
248 and hand pump (38%). The other sources like well (9.6%), spring or tank, or pond (6.4%) also  
249 contribute to drinking water accessibility. The major sources of irrigation were pump set (48.5%)  
250 followed by river or canal (36.5%), tank or pond (7%), and other water harvesting structures  
251 (8%).

#### 252 **4.1 Timber consumption pattern**

253 We found that locals were dependent on the nearby forest to partially meet their timber demand  
254 for agricultural implements, cattle sheds, watch, and ward huts. The total consumption of timber  
255 was 991 cubic meters in the study area, of which 69% of the timber extracted from the nearby  
256 forest. Among the surveyed villages, *Tipparpur*, *Timli*, *Majri*, *Dhaura*, *Gujjar Deras*, *Aduwala*,  
257 and *Jatowala* were entirely dependent on the nearby forest for timber consumption (Table 1). The  
258 timber requirement was highest (66%) for housing, followed by furniture (26%) and agricultural  
259 implements (8%). The timber consumption and net timber requirement met from the forest were  
260 recorded highest (113 cubic meters; hereafter ‘cum’ and 74 cum, respectively) in *Badripur*,  
261 followed by *Sabhawala* (109 cum and 78 cum respectively), *Shahpur* (98 cum and 47 cum,  
262 respectively) and least in *Matak Majri* (9 cum and 6.5 cum, respectively) (Figure 2). The total  
263 annual timber consumption was 1929.9 cum. We recorded the average timber consumption to be  
264  $0.52 \pm 0.22$  cum household<sup>-1</sup> year<sup>-1</sup>, and estimated the average per capita timber consumption to  
265 be 0.04 cum year<sup>-1</sup> (Table 1).

#### 266 **4.2 Fuelwood consumption pattern**

267 We found that villagers were mostly dependent on the forest for fuelwood, as 95% of the total  
268 fuelwood used to fulfill the household energy demand met from the fuelwood extracted from the  
269 nearby forests. About 89% of the fuelwood extracted was used for household energy demand,  
270 and 11% were sold to the nearby market for income generation. Fuelwood consumption and net  
271 fuelwood requirement met from nearby forests were highest in *Timli* (32499.6 Qt. and 30874.6  
272 Qt., respectively) followed by *Mednipur* (30727.7 Qt. and 30113.2 Qt., respectively), *Dandipur*  
273 (29202.6 Qt. and 29202.6 Qt., respectively), and least in *Gujjar Deras* (1649 Qt. and 1649 Qt.,  
274 respectively; Figure 3). The high fuelwood demand in Timli and Mednipur might be because of  
275 the low average income and high population of the villages. In *Gujjar Deras*, the fuelwood  
276 demand and net fuelwood requirement from nearby forests were least due to a low population  
277 (168 individuals). The total annual fuelwood consumption recorded was 29419.3 Qt. The  
278 average fuelwood consumption recorded was  $41.1 \pm 3.5$  Qt. household<sup>-1</sup> year<sup>-1</sup> and in terms of  
279 average per capita fuelwood consumption was about 5.6 Qt. year<sup>-1</sup>. We found that, due to the  
280 inclusive dependency of *Gujjars* on the forests, the per capita fuelwood demand was high (9.8  
281 Qt. year<sup>-1</sup>) as compared to total per capita fuelwood demand (5.6 Qt. year<sup>-1</sup>) (Figure 3).

### 282 **4.3 Fodder consumption pattern**

283 We recorded the total fodder extraction from the study area to be 204475 Qt with an average of  
284  $4949 \pm 9.1$  Qt. household<sup>-1</sup> year<sup>-1</sup>. The average per capita fodder consumption estimated was  
285 3.92 Qt. year<sup>-1</sup>. We found that the annual fodder consumption of Tipparpur village was the  
286 highest (60115 Qt.) followed by *Badripur* (36354 Qt.), *Sabhawala* (34047.7 Qt.), while *Dhauila*  
287 had the least (652.9 Qt.; Table 1). Per household fodder demand was highest in Bansowala  
288 followed by Sabhawala and Badripur (Figure 4). The percentage of fodder demand met from  
289 nearby forests is highest in Gujjar deras and Timli followed by Dhauila and Kulhal (Figure 4).  
290 The locals obtain fodder primarily from nearby forests and farmlands, and from the roadside,  
291 riverside forest, and agro-forestry as per the availability. We recorded 17 species belonging to 14  
292 genera and 10 families, primarily used as fodder by the local inhabitants. The major fodder  
293 species extracted from the forests consist of *Shorea robusta*, *Mallotus philippensis*, *Anogeissus*  
294 *latifolia*, *Millettia auriculata*, *Ehretia laevis*, *Grewia elastica*, *G. oppositifolia*, *Haldinia*  
295 *cordifolia*, *Desmodium oojeinense*, *Terminalia tomentosa*, *Bauhinia variegata*, *B. purpurea*,  
296 *Albizia lebeck*, *Ficus benghalensis*, *F. racemosa*, *Lannea coromandelica*, and *Eulaliopsis*

297 *binnata*. The important cultivated fodder crops grown in farms include *Trifolium alexandrinum*  
298 locally known as *barseem*, *Sorghum bicolor* locally known as *chari*, and residues of wheat,  
299 paddy, and maize.

#### 300 **4.4 Fuelwood use and preference**

301 We found ten species belonging to ten genera and eight families were primarily used as  
302 fuelwood by the local inhabitants, mostly for cooking, boiling water, and space heating. We  
303 estimated the use-value of the species ranged from 5 to 95%, which was highest for *Shorea*  
304 *robusta* (95%; locally known as *Sal*) followed by the major associates of *Sal* forests viz.,  
305 *Mallotus philippensis* (90%; locally known as *Rohini*) and *Terminalia tomentosa* (30%; locally  
306 known as *Sain*). The high use value indicates their great acceptability and availability as  
307 fuelwood, as well as, high anthropogenic pressure on these species. The remaining species  
308 include *Syzygium cumini*, *Anogeissus latifolia*, *Ardisia solanacea*, *Eucalyptus tereticornis*,  
309 *Tectona grandis*, *Clerodendrum viscosum*, and *Desmodium oojeinense* showed <15% use-value,  
310 reflected their low availability and low preference. The major fuelwood species with their ‘Use  
311 Value’ based on quality, characteristics, and availability in the area given in Table 2 and 3.

#### 312 **4.5 Determinants of resource dependency and resource extraction**

313 We found that annual fuelwood consumption, annual fodder consumption, and net requirement  
314 of grazing were positively correlated with the number of households and population of the  
315 villages ( $r^2=0.714$ ,  $0.583$  and  $0.771$ , respectively). The percentage of fuelwood requirements met  
316 from the forest was negatively correlated with the household’s average annual income ( $r^2=-$   
317  $0.494$ ). Distance from the nearby market and annual fuelwood demand was positively correlated  
318 ( $r^2=0.557$ ). We found that distance from the forest and average annual income were the  
319 significant determining factors that affects the household’s timber extraction pattern (Figure 5  
320 and supplementary S2). We found the distance from the market, the average annual income of  
321 the villagers, and the population of the village were the significant determinants of fuelwood  
322 extraction by the households (Figure 6, summary given in supplementary S3). The GL models  
323 with fodder extraction pattern as response variable showed the population of the village, net  
324 grazing requirement, and fodder demand from the forest were the primary determining factor  
325 Figure 7 and supplementary S4). The details of all the GL models with parameters used and AIC  
326 values were given in Table 4.

## 327 **5. Discussion:**

328 Energy is one of the primary requirements for social and economic development, and the  
329 demands vary regionally depending on the socio-economy and geographical conditions (Jain  
330 2010, Lee et al 2013, Bansal et al 2013, Negi et al 2018). In developing countries like India, bio-  
331 fuel is a major energy source for people surviving at the subsistence level (Kumar and Sharma  
332 2009; Negi and Maikhuri 2016). The fuelwood demand of the country ranges from 96–157  
333 million tons having the consumption rate up to 148–242 kg per capita (Bhattacharya and Nanda  
334 1992). However, annual consumption was estimated relatively high in various parts of the  
335 Himalaya (Campbell and Bhattarai 1984; Singh 1989; Metz 1990, Rawat et al. 2009; Negi and  
336 Maikhuri 2016; Bhatt et al. 2016). Poor accessibility of the alternative fuelwood sources makes  
337 the rural population entirely dependent on wood sources (Bhatt et al 2004). In most cases, the  
338 fuelwood demand is met solely from the adjoining forests (Hussain et al 2017). This  
339 uninterrupted extraction of fuelwood and fodder is the major reason for the depletion of forest  
340 patches (Singh 1998). Singh et al (2010) showed fuelwood consumption ranging from 20–25 kg  
341 households<sup>-1</sup> day<sup>-1</sup> in high-altitude areas of Garhwal Himalaya, Uttarakhand. Awasthi et al (2003)  
342 reported 14.65 kg households<sup>-1</sup> day<sup>-1</sup> fuelwood consumption in other villages of the Garhwal  
343 Himalaya. However, the per capita use values were higher than the ones reported from villages  
344 of lower altitudinal ranges of Western Himalaya i.e. 1.49 kg capita<sup>-1</sup> day<sup>-1</sup> (Bhatt et al 1994), for  
345 southern India (1.9–2.2 kg capita<sup>-1</sup> day<sup>-1</sup>; Reddy 1981) and the Himalayan range of Nepal (1.23  
346 kg capita<sup>-1</sup> day<sup>-1</sup>; Mahat et al 1987). The change in fuelwood consumption was also evident in  
347 different altitudinal gradients, as in higher altitude due to cold temperature, fuelwood  
348 consumption was 2–3-fold high compared to low altitude, due to essential warming needs (Bhatt  
349 and Sachan 2004). In our study we found that the fuelwood consumption by the villagers ranged  
350 from 2.6–19.7 kg household<sup>-1</sup> day<sup>-1</sup> with an average of 11.26 kg household<sup>-1</sup> day<sup>-1</sup>. The amount  
351 was higher than the consumption pattern in low altitude areas (Bhatt et al 1994, Mahat et al  
352 1987), and India's average fuelwood consumption, i.e. 4.06 kg household<sup>-1</sup> day<sup>-1</sup> in rural areas as  
353 per the Centre for Development Finance ([www.householdenergy.in](http://www.householdenergy.in)), but comparable with the  
354 consumption pattern of high altitude areas of Western Himalaya (Awasthi et al 2003, Singh et al  
355 2010 and Negi et al 2018).

356 We found that the average fodder extraction from forest by the household was 7.51 kg  
357 household<sup>-1</sup> day<sup>-1</sup>, which was much less than that of recorded earlier from other areas of  
358 Uttarakhand. Dhyani et al 2011 recorded the fodder extraction by the households near Kedarnath  
359 Wildlife Sanctuary range from 62.4 to 80.4 kg household<sup>-1</sup> day<sup>-1</sup> and Dhanai et al 2014 recorded  
360 fodder extraction range from 56.64 to 72.48 kg household<sup>-1</sup> day<sup>-1</sup> near the Takoligad watershed.  
361 The reason may be because of less livestock unit per household in the present study area and the  
362 villagers also collect fodder from the agricultural field and roadside area and from the bank of  
363 small rivulets also. Therefore, the pressure exerted to the forest area for fodder was found much  
364 less than expected.

365 Forest, pastures, arable land, cattle, and human population are the five essential components in  
366 the hill ecosystem which are linked with each other in a series of dynamic relationships starting  
367 from the production to transfer and consumption of the energy (Sharma et al 2009, Khuman et al  
368 2011). The availability of fodder, fuelwood, and litter is vital for the survival and livelihood of  
369 the rural settlements in the Himalayas (Dhyani et al 2011, Dhanai et al 2014). In most Indian  
370 Himalayan regions, fuelwood obtained from the forest is the sole source of energy available to  
371 the residents (Kumar and Sharma 2009; Negi and Maikhuri 2016; Thapa and Weber 1990). The  
372 present study reveals the population of the village, distance from the forest, distance from the  
373 market, and annual average income are the limiting factors for timber, fodder, and fuelwood  
374 demand of the villages. The studies from Barnes et al. 2011; Lee et al. 2013; Bansal et al. 2013,  
375 Jain (2010) and Bansal et al. (2013) from India; Arthur et al. (2010) from Mozambique;  
376 Andadari et al. (2014) from Indonesia Pine et al. (2011) from rural Mexico, Jan (2012) from  
377 northwest Pakistan, Beyene and Koch (2013) from urban Ethiopia concluded that the household  
378 size, education and household income are the most significant factors that determine the  
379 willingness to use cleaner energy instead of forest biomass. Subject to availability, fuelwood as  
380 an essential energy source is easy to collect and use (Specht et al 2015), whereas the other  
381 commercial sources of energy are beyond the reach due to accessibility in remote areas. Due to  
382 remoteness, alternative sources come with high prices and limited supply (FAO 2007). It was  
383 evident in various studies, that the rural population makes greater use of wood for heat and  
384 cooking fuel (Miah et al 2003; Moran-Taylor and Taylor 2010). So, in the past few years, there is  
385 an enormous amount of attention given for reducing biofuel use, as it is nested within the three  
386 major challenges of the developing world – energy, poverty, and climate change (FAO 2007).

387 According to Kanagawa and Nakata (2007), fuelwood consumption increases the direct  
388 payments of rural households, and fuelwood collection also takes valuable time and effort  
389 resulting in loss of education and income generation opportunity for collectors (Hussain et al  
390 2017). Unsustainable fuelwood collection and inefficient conversion technology used in remote  
391 rural areas have severe implications on the environment (Arnold et al 2003; Chen et al 2006). In  
392 recent years, scientists and planners across the world have shown concern about the gap between  
393 forecasted estimates of biomass supply and demand. The increased demand will place stress on  
394 women, children, and the environment, at the national level and different eco-zones of the  
395 country (Gadgil et al 1989).

396 The estimation of extraction and consumption pattern of major forest products in the remote rural  
397 area is crucial as the human population is increasing and the socio-economic pattern and the  
398 environmental conditions are changing day by day. The mean household size of the studied  
399 village is higher than the mean household size of the communities living in the hilly areas of  
400 Uttarakhand and that of the whole country average of 5.3 persons (Census of India 2011). The  
401 majority of respondents (67%) indicated wage labor as the primary source of livelihood, which  
402 directly indicates that the economic status of the major population is low, which has resulted in a  
403 low literacy rate (65.4%) as compared to Dehradun (84.2%). The low literacy rate and  
404 employment of the locals can be improved with the support for better educational and  
405 employment opportunities.

406 As the vegetation of the study area is dominated by *Shorea robusta* and its major associate  
407 timber species such as *Mallotus philippensis*, *Anogeissus latifolia*, *Syzygium cumini*, and  
408 *Terminalia tomentosa*, the pressure in terms of the utilization of these resources by the locals is  
409 higher as compared to the other species. Practice of selective species harvesting has already  
410 reported to affect the species composition and assemblage (Negi and Maikhuri 2016, Rawal et al  
411 2012, Singh et al 2010). Therefore, to reduce the anthropogenic pressure on the forests, the  
412 plantation of indigenous and multipurpose species in consultation with the local inhabitants and  
413 the concerned forest department would be the most practical solution. To reduce forest  
414 dependency and reduction in forest degradation, policy measures to be taken by different  
415 stakeholders. The use of LPGs and their availability to the villagers to be taken care of through  
416 regular supply at a subsidized price. The other suggestive mitigation measures could be the

417 creation of Self Help Groups for alternative livelihood options, assistance in cattle breed  
418 improvement and encouraging stall feeding, the establishment of small scale industries such as  
419 mushroom cultivation, leaf plates using *Sal* leaves, manure making, honey production, etc., along  
420 with initiation and encouragement of the locals for adopting biogas plants and solar power are  
421 few measures that need to be exploited for the fulfillment of the energy demand of the region.  
422 The National Mission for Enhanced Energy Efficiency (NMEEE) under India's National Action  
423 Plan for Climate Change (NAPCC) is already working on these issues, but the inter-sectoral  
424 linkages and deficiency of data sets on energy requirement and consumption pattern of remote  
425 areas causing the difficulty implementing policy intervention in the remote areas.

426

## 427 **6. Conclusion**

428 Understanding the drivers for forest degradation is essential for developing policies and  
429 measures that aim to change the current trends in consumption patterns of forest products  
430 towards a more environmentally friendly outcome. In the present study, we found that lack of  
431 adequate education and dependency of the residents on the natural resource-based livelihood  
432 resulting in the high dependence on the timber and non-timber forest resources and thus high  
433 level of extraction of forest products from the Timli forest. We found that the fuelwood  
434 extraction pattern was high when compared to other published literature in low altitude areas,  
435 whereas the fodder collection is much less compared to other study result in Uttarakhand. The  
436 high level of fuelwood and timber extraction will degrade the forest resources in the future and is  
437 not a good option for the future sustainability of the area and its residents. Policy level  
438 intervention is needed urgently for alternative livelihood opportunities for the people and to  
439 ensure alternative energy sources for cooking and other daily needs. The plantation can be a  
440 sustainable option for the rejuvenation of forest unless and until there is a change in resource  
441 extraction for household and economic needs. Integration of different stakeholders' activity for  
442 reducing forest dependency and generating alternative sustainable livelihood for the  
443 improvement of the socio-economy of the area is urgently needed to conserve the last remaining  
444 forest patch and the diversity of the study area for its sustainable future.

445

## 446 **Acknowledgements**

447 The authors gratefully acknowledge Sh. Vinod Kumar, former Director and Dr. Shashi Kumar,  
448 Director of Indira Gandhi National Forest Academy (IGNFA) for consistent support and  
449 guidance. We also wish to acknowledge Dr. Jagdish Kishwan, Chairman '*Apex Academic*  
450 *Committee on REDD-plus in relation to global warming and Climate Change*' for kind support  
451 during various meetings of REDD-plus Cell at IGNFA. The authors are also indebted to IFS  
452 Probationers of 2014-16 and 2015-17 courses for their participation in the smooth conduct of the  
453 socio-economic survey. Thanks, are also due to Dr. Taibanganba Watham for his help in  
454 preparation of the map.

455

456

## 457 **Author Contributions**

458 Conceptualization and study design (Jiju J. S., Dr. Mohit Gera); Methodology Formal Analysis  
459 and Investigation (Jiju J. S., Soumya Dasgupta, Amit Kumar); Original Draft Preparation (Jiju J.  
460 S. and Soumya Dasgupta); Review and editing (Soumya Dasgupta, Amit Kumar and Mohit  
461 Gera); Resources (Dr Mohit Gera and Jiju j. S.) Supervission (Dr Mohit Gera)

462 **Funding details** - Funding for the study received from REDD+ cell of Indira Gandhi National  
463 Forest Academy, (IGNFA), Dehradun, India

464 **Statement on competing interest** - The authors declare that they have no known competing  
465 financial interests or personal relationships that could have appeared to influence the work  
466 reported in this paper.

467 **Permission and informed consent** - All the necessary permission and informed consent was  
468 taken by the authors wherever it is needed, for the study.

## 469 **References:**

- 470 1. Aggarwal A, Paul V, Das S (2009) Forest Resources: Degradation, Livelihoods, and  
471 Climate Change. In: D. Datt, S. Nischal (Ed.) Looking Back to Change Track. New  
472 Delhi: TERI, pp. 91-108.



- 473 2. Agrawal A, (2007) Forests, governance, and sustainability: Common property theory and  
474 its contributions. *Int. J. Commons*, 1, 111–136.
- 475 3. Arnold M, Ko'hlin G, Persson R, Shepherd G (2003) Fuelwood revisited: what has  
476 changed in the last decade? Bogor Barat, Indonesia: Centre for International Forestry  
477 Research (CIFOR), Occasional Paper No. 39.
- 478 4. Awasti A, Uniyal SK, Rawat GS, Rajvanshi A (2003) Forest resource availability and its  
479 use by the migratory villages of Uttarkashi, Garhwal Himalaya (India). *For. Ecol.*  
480 *Manag.*, 174, 13–24.
- 481 5. Bahuguna VK, Mitra K, Capistrano D, Saigal S (2004) Root to Canopy: Regenerating  
482 Forests through Community State Partnerships. New Delhi: Winrock International India /  
483 Commonwealth Forestry Association India Chapter, pp. 309–316.
- 484 6. Bansal M, Saini RP, Khatod DK (2013) Development of cooking sector in rural areas in  
485 India-A review. *Renewable and Sustainable Energy Reviews* 17, 44-53.
- 486 7. Banyal R, Islam MA, Masoodi TH, Gangoo SA (2013) Energy status and consumption  
487 pattern in rural temperate zone of western Himalayas: a case study. *Indian For.* 139(8):  
488 683-687.
- 489 8. Barnes DF, Khandker SR, Samad HA (2011) Energy poverty in rural Bangladesh. *Energy*  
490 *Policy* 39 (2), 894-904.
- 491 9. Belcher B, Achdiawan R, Dewi S (2015) Forest-based livelihoods strategies conditioned  
492 by market remoteness and forest proximity in Jharkhand, India. *World Dev.* 66: 269–279.
- 493 10. Benato A, Pezzuolo A, Stoppato A, Mirandola A, Pandey S (2016) Improvement of the  
494 Energy System of a Nepali Village through Innovative Exploitation of Local Resources.  
495 *Energy Procedia* 101, 790-797.
- 496 11. Bernard HR (2006) *Research Methods in Anthropology: Qualitative and Quantitative*  
497 *Approaches*, Altamira Press, Oxford, UK.
- 498 12. Bhatt BP, Negi AK, Todaria NP (1994) Fuelwood consumption pattern at different  
499 altitudes in Garhwal Himalaya. *Energy* 19 (4), 465–468.
- 500 13. Bhatt BP, Sachan MS (2004) Firewood consumption along an altitudinal gradient in  
501 mountain villages of India. *Biomass Bioenerg* 27, 69–75.
- 502 14. Bhatt BP, Rathore SS, Lemtur M, Sarkar B (2016) Fuelwood energy pattern and biomass  
503 resources in Eastern Himalaya. *Renewable Energy* 94, 410-417.

- 504 15. Bhattacharya B, Nanda SK (1992) Building fuelwood demand supply scenario. *J Rural*  
505 *Dev.* 11 (6), 773–787.
- 506 16. Campbell JG, Bhattarai TN (1984) People and forests in hill Nepal. Preliminary  
507 presentation of findings of community forestry household and ward leader survey. Project  
508 paper 10, HMG/UNDP/FAO community forestry development project, Nepal.
- 509 17. Cavendish W (2000) Empirical regularities in the poverty-environment relationship of  
510 rural households: Evidence from Zimbabwe. *World Dev.* Elsevier, vol. 28 (11), 1979-  
511 2003. Doi:10.1016/S0305-750X(00)00066-8.
- 512 18. Census India (2011). The Census register. <http://censusindia.gov.in>.
- 513 19. Champion HG, Seth SK (1968) A revised survey of the forest types of India, Government  
514 of India, New Delhi ii + 404 pp.
- 515 20. Chaturvedi RK, Gopalakrishnan R, Jayaraman M, Bala G, Joshi NV, Sukumar R,  
516 Ravindranath NH (2010) Impact of climate change on Indian forests: a dynamic  
517 vegetation modeling approach. *Mitig Adapt Strateg Glob Change*, 16, 119–142,  
518 doi:10.1007/s11027-010-9257-7.
- 519 21. Chen L, Heerink N, Berg MVD (2006) Energy consumption in rural China: a household  
520 model for three villages in Jiangxi Province. *Ecol Econ* 58(2):407–420.
- 521 22. Davidar P, Sahoo S, Mammen P, Acharya P, Puyravaud JP, Arjunan M, Garrigues J,  
522 Roessingh K (2010) Assessing the extent and causes of forest degradation in India: Where  
523 do we stand? *Biological Conservation - BIOL CONSERV.* 143. 2937-2944.  
524 10.1016/j.biocon.2010.04.032.
- 525 23. Dhanai R, Negi R, Parmar M, Singh S (2014) Fuelwood & Fodder Consumption Pattern  
526 in Uttarakhand Himalayan Watershed. *Int. J. Environ* 2014; 4(1): 35-40
- 527 24. Dhyani S, Maikhuri RK, Dhyani D (2011) Energy budget of fodder harvesting pattern  
528 along the altitudinal gradient in Garhwal Himalaya, India. *Biomass Bioenerg.*, Volume  
529 35, Issue 5, Pages 1823-1832, ISSN 0961-9534. Doi:10.1016/j.biombioe.2011.01.022.  
530 DOI:10.1007/s40974-016-0050-7.
- 531 25. FAO (2007) A review of the current state of bioenergy development in G8 þ5 countries, 2  
532 ([www.fao.org](http://www.fao.org)S).
- 533 26. Fisher M (2004) Household welfare and forest dependence in Southern Malawi. *Environ.*  
534 *Dev. Econ*, 9, 135e154. Doi:10.1017/ S1355770X03001219.

- 535 27. Forest Survey of India (2013) India State of Forest Report (ISFR), Forest Survey of India,  
536 Dehradun, Uttarakhand.
- 537 28. Gadgil M, Sinha M, Pillai J (1989) India: A Biomass Budget. Final report of the study  
538 group on fuelwood and fodder. Centre for Ecological Sciences, Indian institute of  
539 Science, Bangalore, India, 36 pp.
- 540 29. Gera M, JS Jiju, Yadav S, Kumar S (2017) Emissions Reduction Due To Avoidance of  
541 Forest Degradation: A Pilot Study, *Indian For.* 143 (9): 915-920.
- 542 30. Huda ASN, Mekhilef S, Ahsan A (2014) Biomass energy in Bangladesh: Current status  
543 and prospects. *Renewable and Sustainable Energy Reviews* 30, 504–517.
- 544 31. Hussain A, Dasgupta S, Bargali HS (2017) Fuelwood consumption patterns by semi-  
545 nomadic pastoralist community and its implication on conservation of Corbet Tiger  
546 Reserve, India. *Energy Ecology and Environment*, 2(1): 49-59
- 547 32. Hussain J, Zhou K, Akbar M, Khan MZ, Raza G, Ali S, Hussain A, Abbas Q, Khan G,  
548 Khan M, Abbas H, Iqbal S, Ghulam A (2019) Dependence of rural livelihoods on forest  
549 resources in Naltar Valley, a dry temperate mountainous region, Pakistan. *Glob. Ecol.*  
550 *Conserv.* 20 (2019) e00765.
- 551 33. Indian Council of Forestry Research and Education (2001) Forestry Statistics of India  
552 1987-2001. Dehradun: ICFRE, 234 pp.
- 553 34. IEA (2010) Energy poverty: How to make modern energy access universal? International  
554 Energy Agency, World Energy Outlook, Paris
- 555 35. IEA (2017) Energy Access Outlook 2017 from Poverty to Prosperity. Website:  
556 [www.iea.org](http://www.iea.org)
- 557 36. Imai N, Furukawa T, Tsujino R, Kitamura S, Yumoto T (2018) Correction: Factors  
558 affecting forest area change in Southeast Asia during 1980-2010. *PLOS ONE* 13(6):  
559 e0199908. doi:10.1371/journal.pone.0199908.
- 560 37. Jain G (2010) Energy security issues at household level in India. *Energy Policy* 38 (6),  
561 2835- 2845.
- 562 38. Johnsingh AJT, Ramesh K, Qureshi Q, David A, Goyal SP, Rawat GS, Rajapandian K,  
563 Prasad S (2004) Conservation Status of tiger and associated species in the Terai Arc  
564 Landscape India, Wildlife Institute of India, Dehradun.
- 565 39. Kanagawa M, Nakata T (2007) Analysis of the energy access improvement and its socio-  
566 economic impacts in rural areas of developing countries. *Ecol Econ* 62(2):319–329.

- 567 40. Khuman YSC, Pandey R, Rao KS (2011) Fuelwood consumption patterns in Fakot  
568 watershed, Garhwal Himalaya, Uttarakhand. *Energy*, 36(8), 4769-4776.
- 569 41. Kohl M, Lasco R, Cifuentes M, Jonsson O, Korhonen K, Mundhenk P, de Jesus Navar J,  
570 Stinson G (2015) Changes in forest production, biomass and carbon: results from the  
571 2015 UN Global Forest Resources Assessment. *For. Ecol. Manage.* 352, 21-34.
- 572 42. Kumar H, Pandey BW, Anand S (2019) Analyzing the Impacts of forest Ecosystem  
573 Services on Livelihood Security and Sustainability: A Case Study of Jim Corbett  
574 National Park in Uttarakhand. *International Journal of Geoheritage and Parks*, 2019,  
575 Volume 7, Issue 2, Pages 45-55, ISSN 2577-4441. Doi:10.1016/j.ijgeop.2019.05.003.
- 576 43. Kumar M, Sharma CM (2009) Fuelwood consumption pattern at different altitudes in  
577 rural areas of Garhwal Himalaya. *Biomass and Bioenergy* 33,1413-1418.
- 578 44. Lance K, Kremen C, Raymond I (1994) Extraction of Forest Products Quantitative of  
579 Park and Buffer Zone and Long-Term Monitoring. Report to Park Delimitation Unit,  
580 Wildlife Conservation Society/PCDIM, Antananarivo, Madagascar.
- 581 45. Lee LYT (2013) Household energy mix in Uganda. *Energy Economics* 39, 252-261.
- 582 46. Madhu V (2009) Valuation of forest ecosystem services in Uttarakhand Himalayas for  
583 setting mechanisms for compensation and rewards for ecosystem services for  
584 communities conserving forests of Uttarakhand State. XIII World Forestry Congress.  
585 Buenos Aires: Argentina
- 586 47. Mahat TBS, Griffin DM, Shepherd KP (1987). Human impact on some forest of the  
587 middle hills of Nepal. Part 4: A detailed study in Southeast Sindhu Palanchock and  
588 Northeast Kabhere Palanchock. *Mt Res Dev*, 7, 114–134.
- 589 48. Mamo G, Sjaastad E, Vedeld P (2007) Economic dependence on forest resources: a case  
590 from Dendi District, Ethiopia. *For. Policy Econ*, 2007, 9, 916e927.  
591 Doi:10.1016/j.forpol.2006.08.001.
- 592 49. Mascia MB, Pailler S, Thieme ML, Rowe A, Bottrill MC, Danielsen F, Geldmann J,  
593 Naidoo R, Pullin AS, Burgess ND (2014) Commonalities and complementarities among  
594 approaches to conservation monitoring and evaluation. *Biol. Conserv.*, 169: 258–267.
- 595 50. Metz JJ (1990) Conservation practices at upper elevation village of west Nepal. *Mt Res*  
596 *Dev*, 10 (4), 7–15.

- 597 51. Miah D, Ahmed R, Uddin MB (2003) Biomass fuel use by the rural households in  
598 Chittagong region, Bangladesh. *Biomass Bioenergy*,24:277–283.
- 599 52. Mishra A (2008) Determinants of fuelwood use in rural Orissa: Implications for energy  
600 transition South Asian Network for development and environmental economics  
601 (SANDEE), Working Paper No. 37-08.
- 602 53. Mitra M, Kumar A, Adhikari BS, Rawat GS (2017) Fuelwood resources and their use  
603 pattern by Bhotia community in Niti valley, Western Himalaya. *Botanica Orientalis –*  
604 *Journal of Plant Science*, 10: 1–6.
- 605 54. Moran-Taylor MJ, Taylor MJ: Land and len~a (2010) linking transnational migration,  
606 natural resources, and the environment in Guatemala. *Popul Environ* 32:198–215.
- 607 55. Mukherjee N (1933) Participatory rural appraisal: methodology and applications.  
608 Concept Publishing Company, Delhi, India.
- 609 56. Nagothu US (2001) Fuelwood and fodder extraction and deforestation: mainstream views  
610 in India discussed on the basis of data from the semi-arid region of Rajasthan. *Geoforum*  
611 Volume 32, Issue 3, Pages 319-332, ISSN 0016-7185.doi:10.1016/S0016-  
612 7185(00)00034-8.
- 613 57. Natarajan I (1985) Domestic fuel survey with special reference to kerosene, I. New  
614 Delhi: National Council for Applied Economic Research.
- 615 58. Nayak BP, Kohli P, Sharma JV (2012) Livelihood of local communities and forest  
616 degradation in India: Issues for REDD? New Delhi: The Energy and Resources Institute.
- 617 59. Negi VS, Maikhuri RK (2016) Forest resources consumption pattern in Govind Wildlife  
618 Sanctuary, Western Himalaya, India. *Journal of Environmental planning and*  
619 *management* 10.1080/09640568.2016.1213707
- 620 60. Negi VS, Joshi BC, Pathak R, Rawal RS, Sekar KC (2018) Assessment of fuelwood  
621 diversity and consumption patterns in cold desert part of Indian Himalaya: implication for  
622 conservation and quality of life, *Journal of Cleaner Production*, doi:  
623 10.1016/j.jclepro.2018.05.237
- 624 61. Nelson EJ, Kareiva P, Ruckelshaus M, Arkema K, Geller G, Girvetz E, Goodrich D,  
625 Matzek V, Pinsky M, Reid W, Saunders M, Semmens D, Tallis H (2013) Climate  
626 change's impact on key ecosystem services and the human well-being they support in

- 627 the US. *Frontiers in Ecology and the Environment*, 11: 483-  
628 893. <https://doi.org/10.1890/120312>
- 629 62. Ofoegbu C, Chirwa P, Francis J, Folarannmi, Babalola D, Babalola F (2017) Socio-  
630 economic factors influencing household dependence on forests and its implication for  
631 forest-based climate change interventions Socio-economic factors influencing household  
632 dependence on forests and its implication for forest-based climate change interventions §.  
633 *Southern Forests: J. For. Sci.* Doi:10.2989/20702620.2016.1255420.
- 634 63. Osei WY (1993) Woodfuel and deforestation-answers for a suitable environment. *J.*  
635 *Environ. Manage.* 37, 51–62.
- 636 64. Parry L, Barlow J, Pereira H (2014) Wildlife harvest and consumption in Amazonia’s  
637 urbanized wilderness. *Conserv Lett* 7: 565–574.
- 638 65. Rahut, D.B., Behera, B., Ali, A., 2016. Household energy choice and consumption  
639 intensity: Empirical evidence from Bhutan. *Renewable and Sustainable Energy Reviews*  
640 53, 993- 1009.
- 641 66. Rana E, Thwaites R, Luck G (2016) Trade-offs and synergies between carbon, forest  
642 diversity and forest products in Nepal community forests. *Environmental Conservation*  
643 10.1017/S0376892916000448
- 644 67. Rawat GS, Mukherjee SK (2005) Biodiversity of foothills of the Himalya. In. Rawat JK,  
645 Srivastava SK, Biswas S, Vasistha HB, (Ed.) *Proceeding of the workshop on*  
646 *conservation of Biodiversity in India-status, challenges and efforts*, Indian Council of  
647 *Forestry Research and Education, Dehradun, 43-50.*
- 648 68. Rawal RS, Gairola S, Dhar U (2012) Effects of disturbance intensities on vegetation  
649 patterns in oak forests of Kumaun, west Himalaya. *Journal of Mountain Science* 9 (2),  
650 157-165.
- 651 69. Reddy AK (1981) An Indian village agricultural ecosystem case study of Ungra village.  
652 Part II. Discussion. *Biomass* 1:77-88.
- 653 70. Robledo C, Forner C (2005) *Forest and Climate Change Working Paper 2. Adaptation of*  
654 *forest ecosystems and the forest sector to Climate Change.* Food and Agriculture  
655 *Organization of the United Nations, Swiss Agency for Development and Cooperation,*  
656 *and Swiss Foundation for Development and International Cooperation.*

- 657 71. Roy MM, Singh KA (2008) The fodder situation in rural India: future outlook. *Int For*  
658 *Rev* 10(2): 217–234.
- 659 72. Rustagi D, Engel S, Kosfeld M (2010) Conditional cooperation and costly monitoring  
660 explain success in forest commons management. *Science* 330, 961–965
- 661 73. Sassen M, Sheil D, Giller KE (2015) Fuelwood collection and its impacts on a protected  
662 tropical mountain forest in Uganda. *Forest Ecology and Management* 354, 56–67.
- 663 74. Scholes S (2016) Climate change and ecosystem services: Climate change and ecosystem  
664 services. *Wiley Interdisciplinary Reviews: Climate Change*. 7. 10.1002/wcc.404.
- 665 75. Sharma C, Gairola S, Ghildiyal SK, Suyal S (2009) Forest Resource Use Patterns in  
666 Relation to Socioeconomic Status. *Mt Res Dev* 29. 308-319. Doi:10.1659/mrd.00018.
- 667 76. Sharpe GW (1976) Introduction to forestry. 4th edition. McGraw-Hill Book company.  
668 New York 554 pp.
- 669 77. Shrestha S, Shrestha UB, Bawa K (2018) Socio-economic factors and management  
670 regimes as drivers of tree cover change in Nepal. *PeerJ*. Doi:10.7717/peerj.4855.
- 671 78. Singh G, Rawat GS, Verma D (2010) Comparative study of fuelwood consumption by  
672 villagers and seasonal “Dhaba owners” in the tourist affected regions of Garhwal  
673 Himalaya, India. *Energy Policy* 38(4), 1895-1899.
- 674 79. Singh MP, Bhojvaid PP, de Jong W, Ashraf J, Reddy SR (2017) Forest transition and  
675 socio-economic development in India and their implications for forest transition theory.  
676 *For Policy Econ* 76: 65–71
- 677 80. Singh N, Sundriyal RC (2009) Fuelwood, Fodder Consumption and Deficit Pattern in  
678 Central Himalayan Village. *Nature and Science* 7(4):85-88) (ISSN 1545-0740).
- 679 81. Singh SP (1998) Chronic disturbance, a principal cause of environmental degradation in  
680 developing countries. *Environ. Conserv.*, 1998, 25, 1–2.
- 681 82. Singh V (1989) Energetic of agroecosystem and its relation to forest ecosystem in the  
682 Central Himalaya. Ph.D. Thesis, Kumaun University, Nainital, India.
- 683 83. Specht MJ, Pinto SRR, Albuquerque UP, Tabarelli M, Melo FP (2015) Burning  
684 biodiversity: Fuelwood harvesting causes forest degradation in human-dominated tropical  
685 landscapes. *Global Ecology and Conservation* 3, 200-209.
- 686 84. Thapa GB, Weber KE (1990) Actors and factors of deforestation in "Tropical Asia".  
687 *Environ. Conserv.*, 1990, 17: 19-27.

- 688 85. Vasudevan P, Santosh (1987) The role of women in energy related activities in the  
689 mountains. In: Kumar V, Ahuja D, editors. Rural energy planning for the Indian  
690 Himalaya. New Delhi: Wiley.
- 691 86. Velho N, DeFries RS, Tolonen A, Srinivasan U, Patil A (2018) Aligning conservation  
692 efforts with resource use around protected areas. *Ambio*. Doi:10.1007/s13280-018-1064-  
693 5.
- 694 87. Wen Y, Theint Htun T, Chan Ko Ko A (2017) Assessment of forest resources  
695 dependency for local livelihood around protected area: a case study in Popa mountain  
696 park, Central Myanmar. *Intermt. J. Sci* 3, 34e43. Doi:10.18483/ijSci.1176.
- 697 88. World Bank (2006) Alleviating Poverty through Forest Development (An article of  
698 World Bank on India). <http://www.worldbank.org/ieg>.
- 699 89. World Energy Council (2016) World Energy Resources. [www.worldenergy.org](http://www.worldenergy.org)
- 700 90. Wunder S, Angelsen A, Belcher B (2014) Forests, Livelihoods, and Conservation:  
701 Broadening the Empirical Base, *World Dev.* Volume 64, Supplement 1, Pages S1-S11,  
702 ISSN 0305-750X. doi:10.1016/j.worlddev.2014.03.007.
- 703 91. Yadav BK, Nandy S (2015) Mapping aboveground woody biomass using forest  
704 inventory, remote sensing and geostatistical techniques. *Environ Monit Assess* 187(5),  
705 308.

706

707

708

709

710

711

712

713

714



715  
716  
717  
718  
719  
720  
721  
722  
723  
724

725 Table 1: Number of villages and households surveyed in the socio-economic study with the  
726 Annual Timber Demand and Fodder Demand

| S. No. | Name of village | Number of Households | Households surveyed | Annual Timber Demand (CuM) |           |                  |        | Fodder quantity (Qt) |
|--------|-----------------|----------------------|---------------------|----------------------------|-----------|------------------|--------|----------------------|
|        |                 |                      |                     | Housing                    | Furniture | Agri-Equipment's | Total  |                      |
| 1.     | Grant           | 450                  | 25                  | 25.56                      | 15.84     | 1.98             | 43.38  | 26017.2              |
| 2.     | Shahpur         | 340                  | 25                  | 0                          | 8.42      | 8.2              | 16.62  | 8190.6               |
| 3.     | Judli           | 428                  | 25                  | 32                         | 6         | 2                | 40     | 4936.6               |
| 4.     | Ramgarh         | 250                  | 15                  | 1.87                       | 6.55      | 0.67             | 9.101  | 14235                |
| 5.     | Dharmawala      | 400                  | 25                  | 26.55                      | 2.38      | 1.75             | 30.68  | 15038                |
| 6.     | Bansoowala      | 55                   | 15                  | 5.92                       | 9.76      | 0                | 15.68  | 10679.9              |
| 7.     | Dandipur        | 538                  | 25                  | 24.44                      | 1.3       | 0.26             | 26     | 20107.9              |
| 8.     | Kulhal          | 110                  | 15                  | 45                         | 30        | 5                | 80     | 4577.1               |
| 9.     | Sabhawala       | 400                  | 25                  | 17.39                      | 2.2       | 0                | 19.591 | 34047.7              |
| 10.    | Timli           | 450                  | 25                  | 73.74                      | 35.96     | 34.35            | 144.05 | 14125.5              |
| 11.    | Kunja           | 450                  | 25                  | 64.24                      | 4.604     | 166.89           | 235.74 | 24273                |



|                   |   |   |   |   |   |   |   |   |   |   |
|-------------------|---|---|---|---|---|---|---|---|---|---|
| <i>Judli</i>      | √ | √ | – | – | – | √ | – | – | – | – |
| <i>Ramgarh</i>    | √ | √ | – | √ | – | – | – | – | √ | – |
| <i>Dharmawala</i> | √ | √ | – | – | – | – | – | – | – | – |
| <i>Bansoowala</i> | √ | √ | – | – | – | – | – | – | – | – |
| <i>Dandipur</i>   | √ | √ | – | – | – | – | – | – | – | – |
| <i>Kulhal</i>     | √ | √ | – | – | – | – | – | – | – | – |
| <i>Sabhawala</i>  | √ | √ | √ | – | – | – | – | – | – | √ |
| <i>Timli</i>      | √ | √ | – | – | – | – | – | – | – | – |

731 Abbreviations: Sh= *Shorea robusta*, Mp= *Mallotus philippensis*, Tt= *Terminalia tomentosa*, Sc=  
732 *Syzygium cumini*, Al= *Anogeissus latifolia*, As= *Ardisia solanacea*, Et= *Eucalyptus tereticornis*,  
733 Tg= *Tectona grandis*, Cv= *Clerodendrum viscosum*, Do= *Desmodium oojeinense*

734

735 Table 3. Major fuelwood species with their ‘Use Value’ based on quality, characteristics and  
736 availability in Timli Range of Shivalik region, Uttarakhand, India.

| Species                        | Family           | Density (ind. ha <sup>-1</sup> ) | Availability* | Use Value (%) |
|--------------------------------|------------------|----------------------------------|---------------|---------------|
| <i>Shorea robusta</i>          | Dipterocarpaceae | 146.1                            | High          | 95            |
| <i>Mallotus philippensis</i>   | Euphorbiaceae    | 34.4                             | High          | 90            |
| <i>Terminalia tomentosa</i>    | Combretaceae     | 5.2                              | Medium        | 30            |
| <i>Syzygium cumini</i>         | Myrtaceae        | 4.6                              | Medium        | 10            |
| <i>Anogeissus latifolia</i>    | Combretaceae     | 1.1                              | Very low      | 10            |
| <i>Ardisia solanacea</i>       | Primulaceae      | 0.8                              | Very low      | 10            |
| <i>Eucalyptus tereticornis</i> | Myrtaceae        | 0.6                              | Very low      | 5             |
| <i>Tectona grandis</i>         | Lamiaceae        | 9.2                              | Low           | 5             |
| <i>Clerodendrum viscosum</i>   | Verbenaceae      | 0.5                              | Very low      | 5             |
| <i>Desmodium oojeinense</i>    | Fabaceae         | 1.8                              | Very low      | 5             |

737 \* Availability (individuals ha<sup>-1</sup>): Very low= <100, Low= 100-200, Medium= 200-300, High =  
738 300-400, and Very high = >400. Species: a = tree, b = shrub.

739

740  
741  
742  
743  
744  
745  
746  
747  
748  
749

Table 4: Table showing AIC values of different GLM

|                        | GLM Model                                                                                               | Log Likelihood | AIC    | Delta AIC | Weight |
|------------------------|---------------------------------------------------------------------------------------------------------|----------------|--------|-----------|--------|
| Annual Timber Demand   | Annual Timber Demand~ Distance from Forest+ Annual Income                                               | -26.535        | 61.069 | 0.00      | 0.758  |
|                        | Annual Timber Demand~ Distance from Forest+ Annual Income+ Distance from Market                         | -26.108        | 66.5   | 2.77      | 0.190  |
|                        | Annual Timber Demand~ Distance from Forest+ Annual Income+ Distance from Market+ Literacy               | -25.441        | 69.3   | 5.61      | 0.046  |
|                        | Annual Timber Demand~ Distance from Forest+ Annual Income+ Distance from Market+ Literacy + Population  | -25.085        | 73.5   | 9.77      | 0.006  |
| Annual Fuelwood Demand | Annual Fuelwood Demand~ Distance from Market+ Population+ Annual Income                                 | -17.069        | 48.4   | 0.00      | 0.683  |
|                        | Annual Fuelwood Demand~ Distance from Market+ Population                                                | -20.698        | 52.1   | 3.64      | 0.111  |
|                        | Annual Fuelwood Demand~ Distance from Market+ Population+ Annual Income+ Distance from Forest           | -16.806        | 52.1   | 3.65      | 0.11   |
|                        | Annual Fuelwood Demand~ Distance from Market+ Population+ Annual Income+ Distance from Forest+ Literacy | -16.782        | 56.9   | 8.47      | 0.01   |
| Annual Fodder Demand   | Annual Fodder Demand~ Fodder demand from Forest+ Population+ Net Grazing Requirement                    | -21.91         | 53.82  | 0.00      | 0.962  |
|                        | Annual Fodder Demand~ Distance from Market                                                              | -27.859        | 63.2   | 9.32      | 0.009  |

|  |                                                     |         |      |      |       |
|--|-----------------------------------------------------|---------|------|------|-------|
|  | Annual Fodder Demand~ Distance from Forest          | -27.830 | 63.2 | 9.26 | 0.009 |
|  | Annual Fodder Demand~ Fodder Demand Met from Forest | -27.041 | 61.6 | 7.68 | 0.02  |

750

751

752

753

754

755

756

757

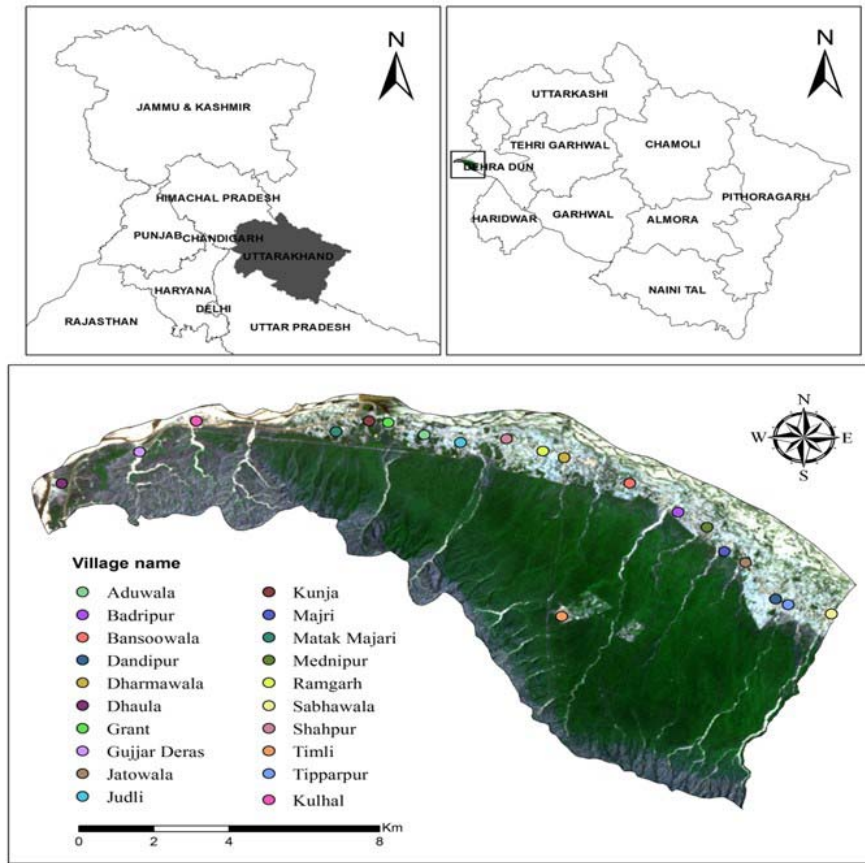

758

759 Figure 1. Map showing location of the villages in Timli Shiwalik region of Uttarakhand, India

760

761

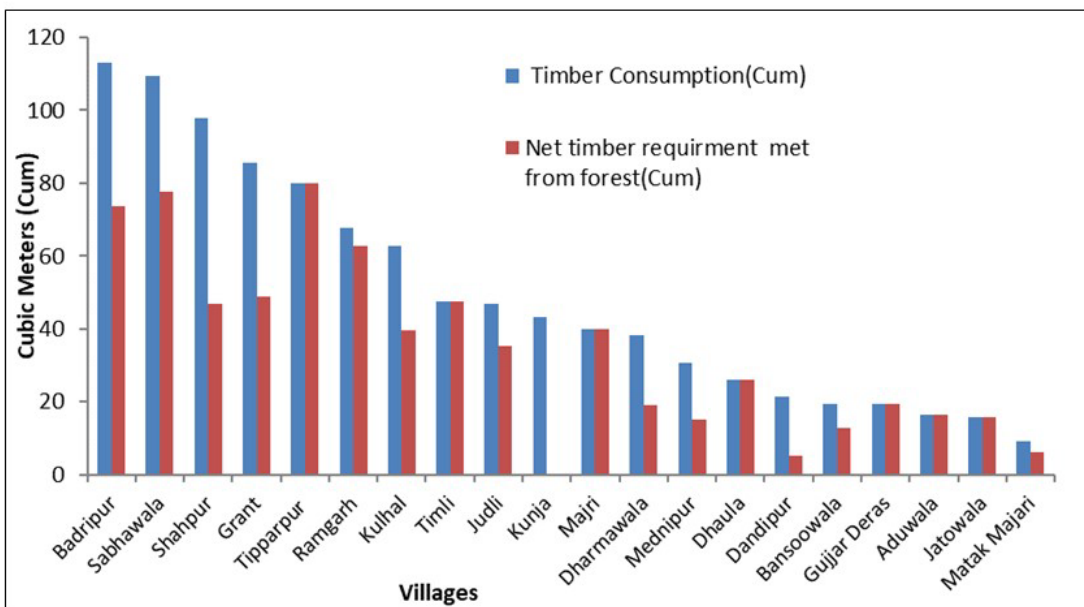

762  
 763 Figure 2. Timber demand and net Timber requirement met from forests in the Timli Shivalik  
 764 region

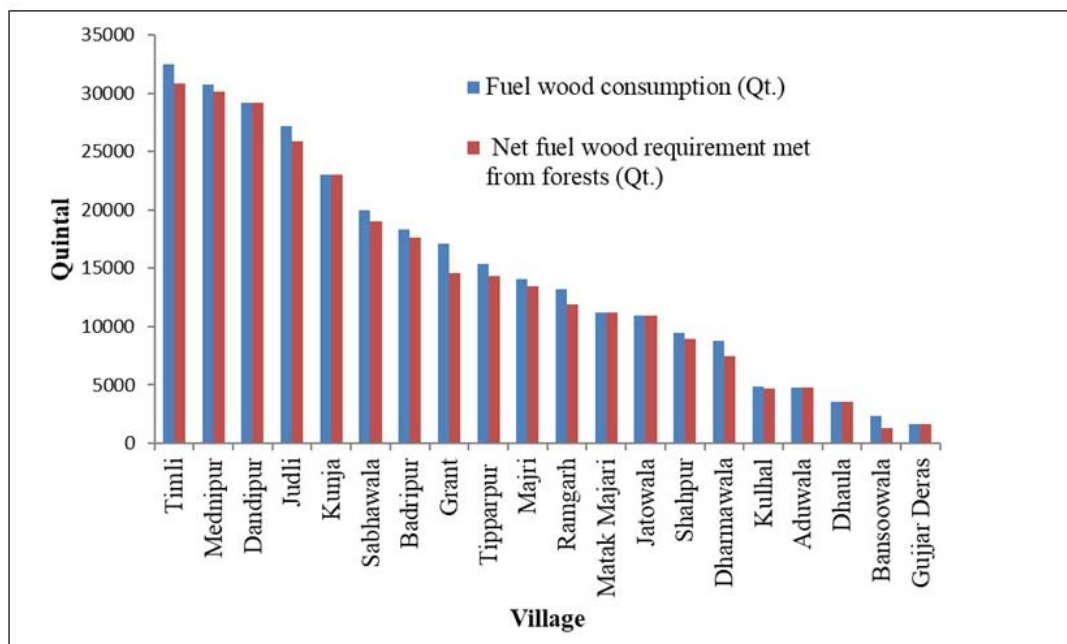

765  
 766 Figure 3 – Fuelwood demand and Net fuelwood requirement (in Quintal) from Forest of studied  
 767 villages.

768

769

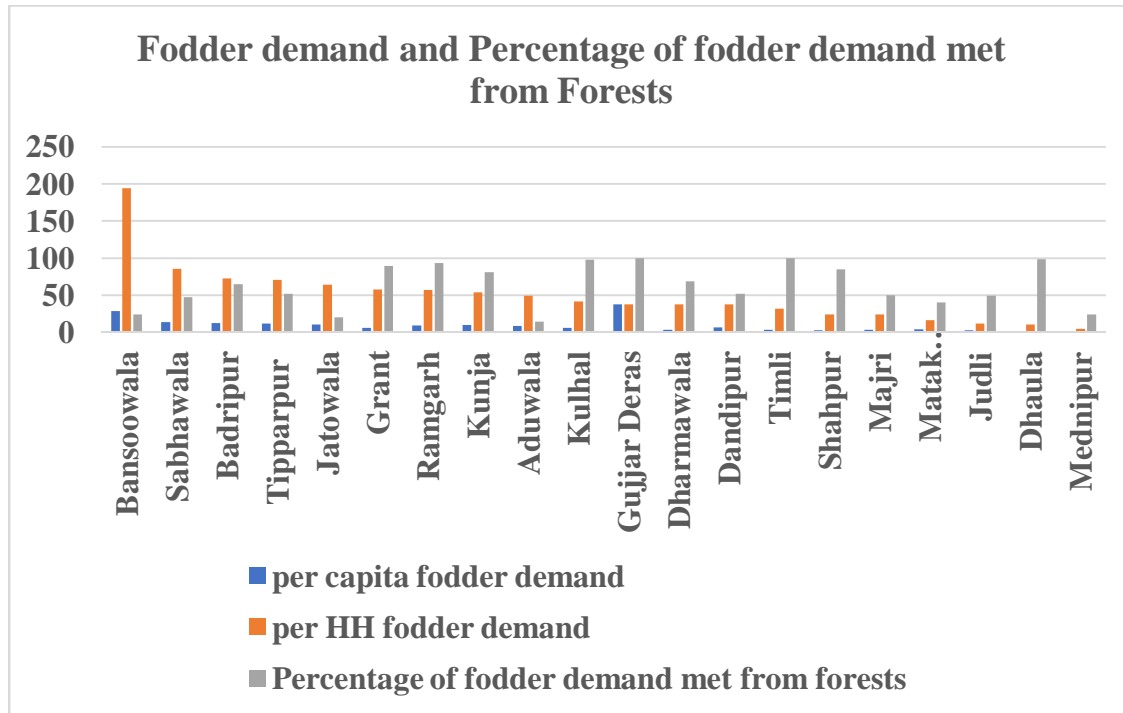

770

771 Figure 4 – Per capita fodder demand, per household fodder demand (in Quintal) and percentage  
 772 of fodder demand met from nearby Forest of studied villages.

773

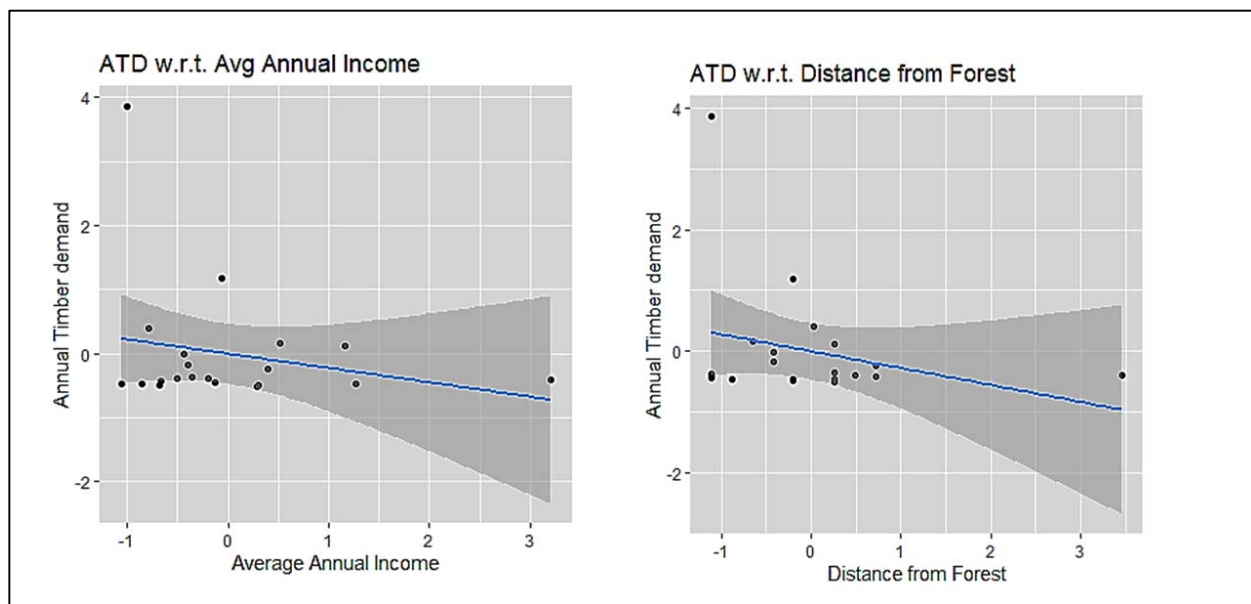

774



775 Figure 5. Annual timber demand with determining variables as found in generalized linear  
776 modeling

777

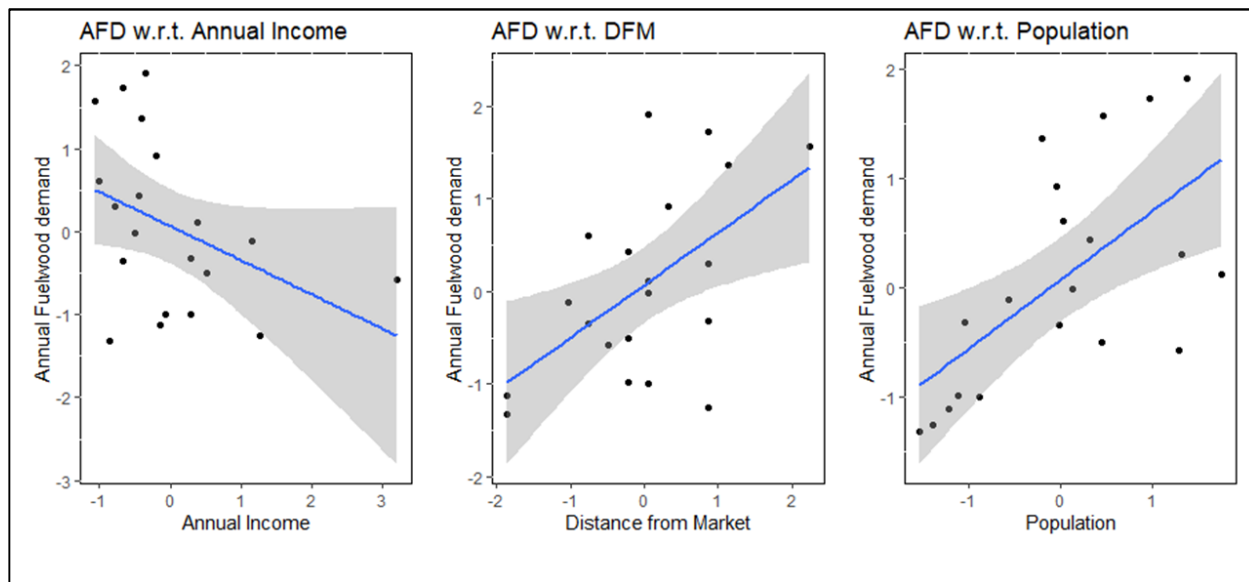

778

779 Figure 6. Annual fodder demand with determining variables as found in generalized linear  
780 modeling

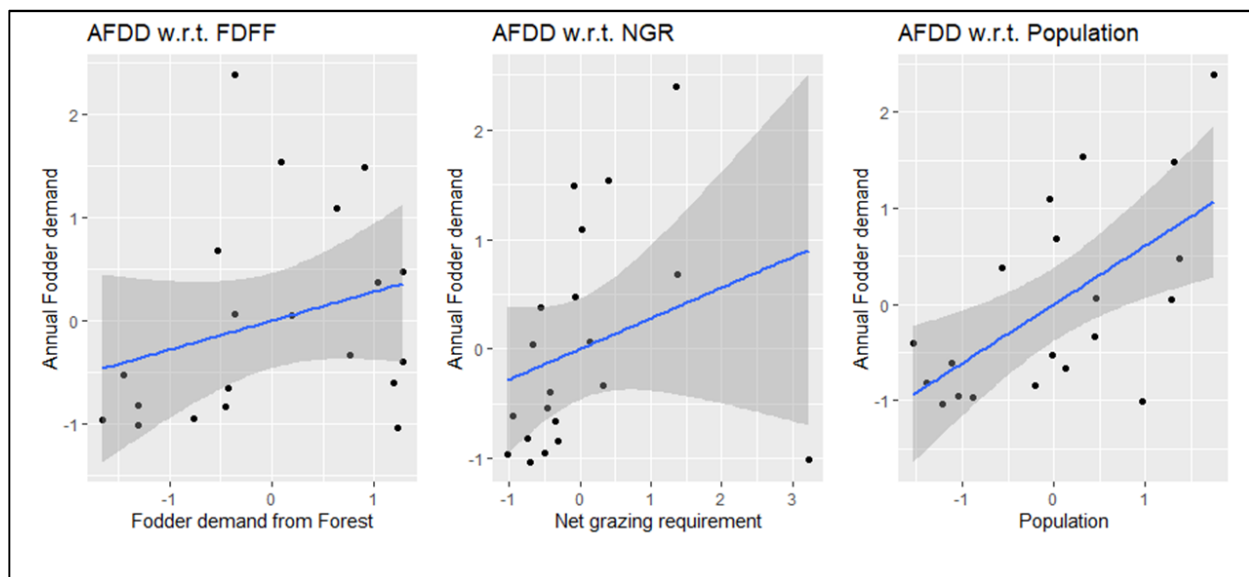

781

782 Figure 7. Annual fodder demand with determining variables as found in generalized linear  
783 modeling

784

785
